# Supplementary material for: The origins of dengue and chikungunya viruses in Ecuador following increased migration from Venezuela and Colombia
Source: PubMed Central journal article supplement (PMC7031975; doi:10.1186/s12862-020-1596-8), 2020-02-19

- Location
- Argentina
  - Brazil
  - Colombia
  - Ecuador
  - India
  - Mexico
  - Nicaragua
  - Puerto\_Rico
  - USA
  - Venezuela

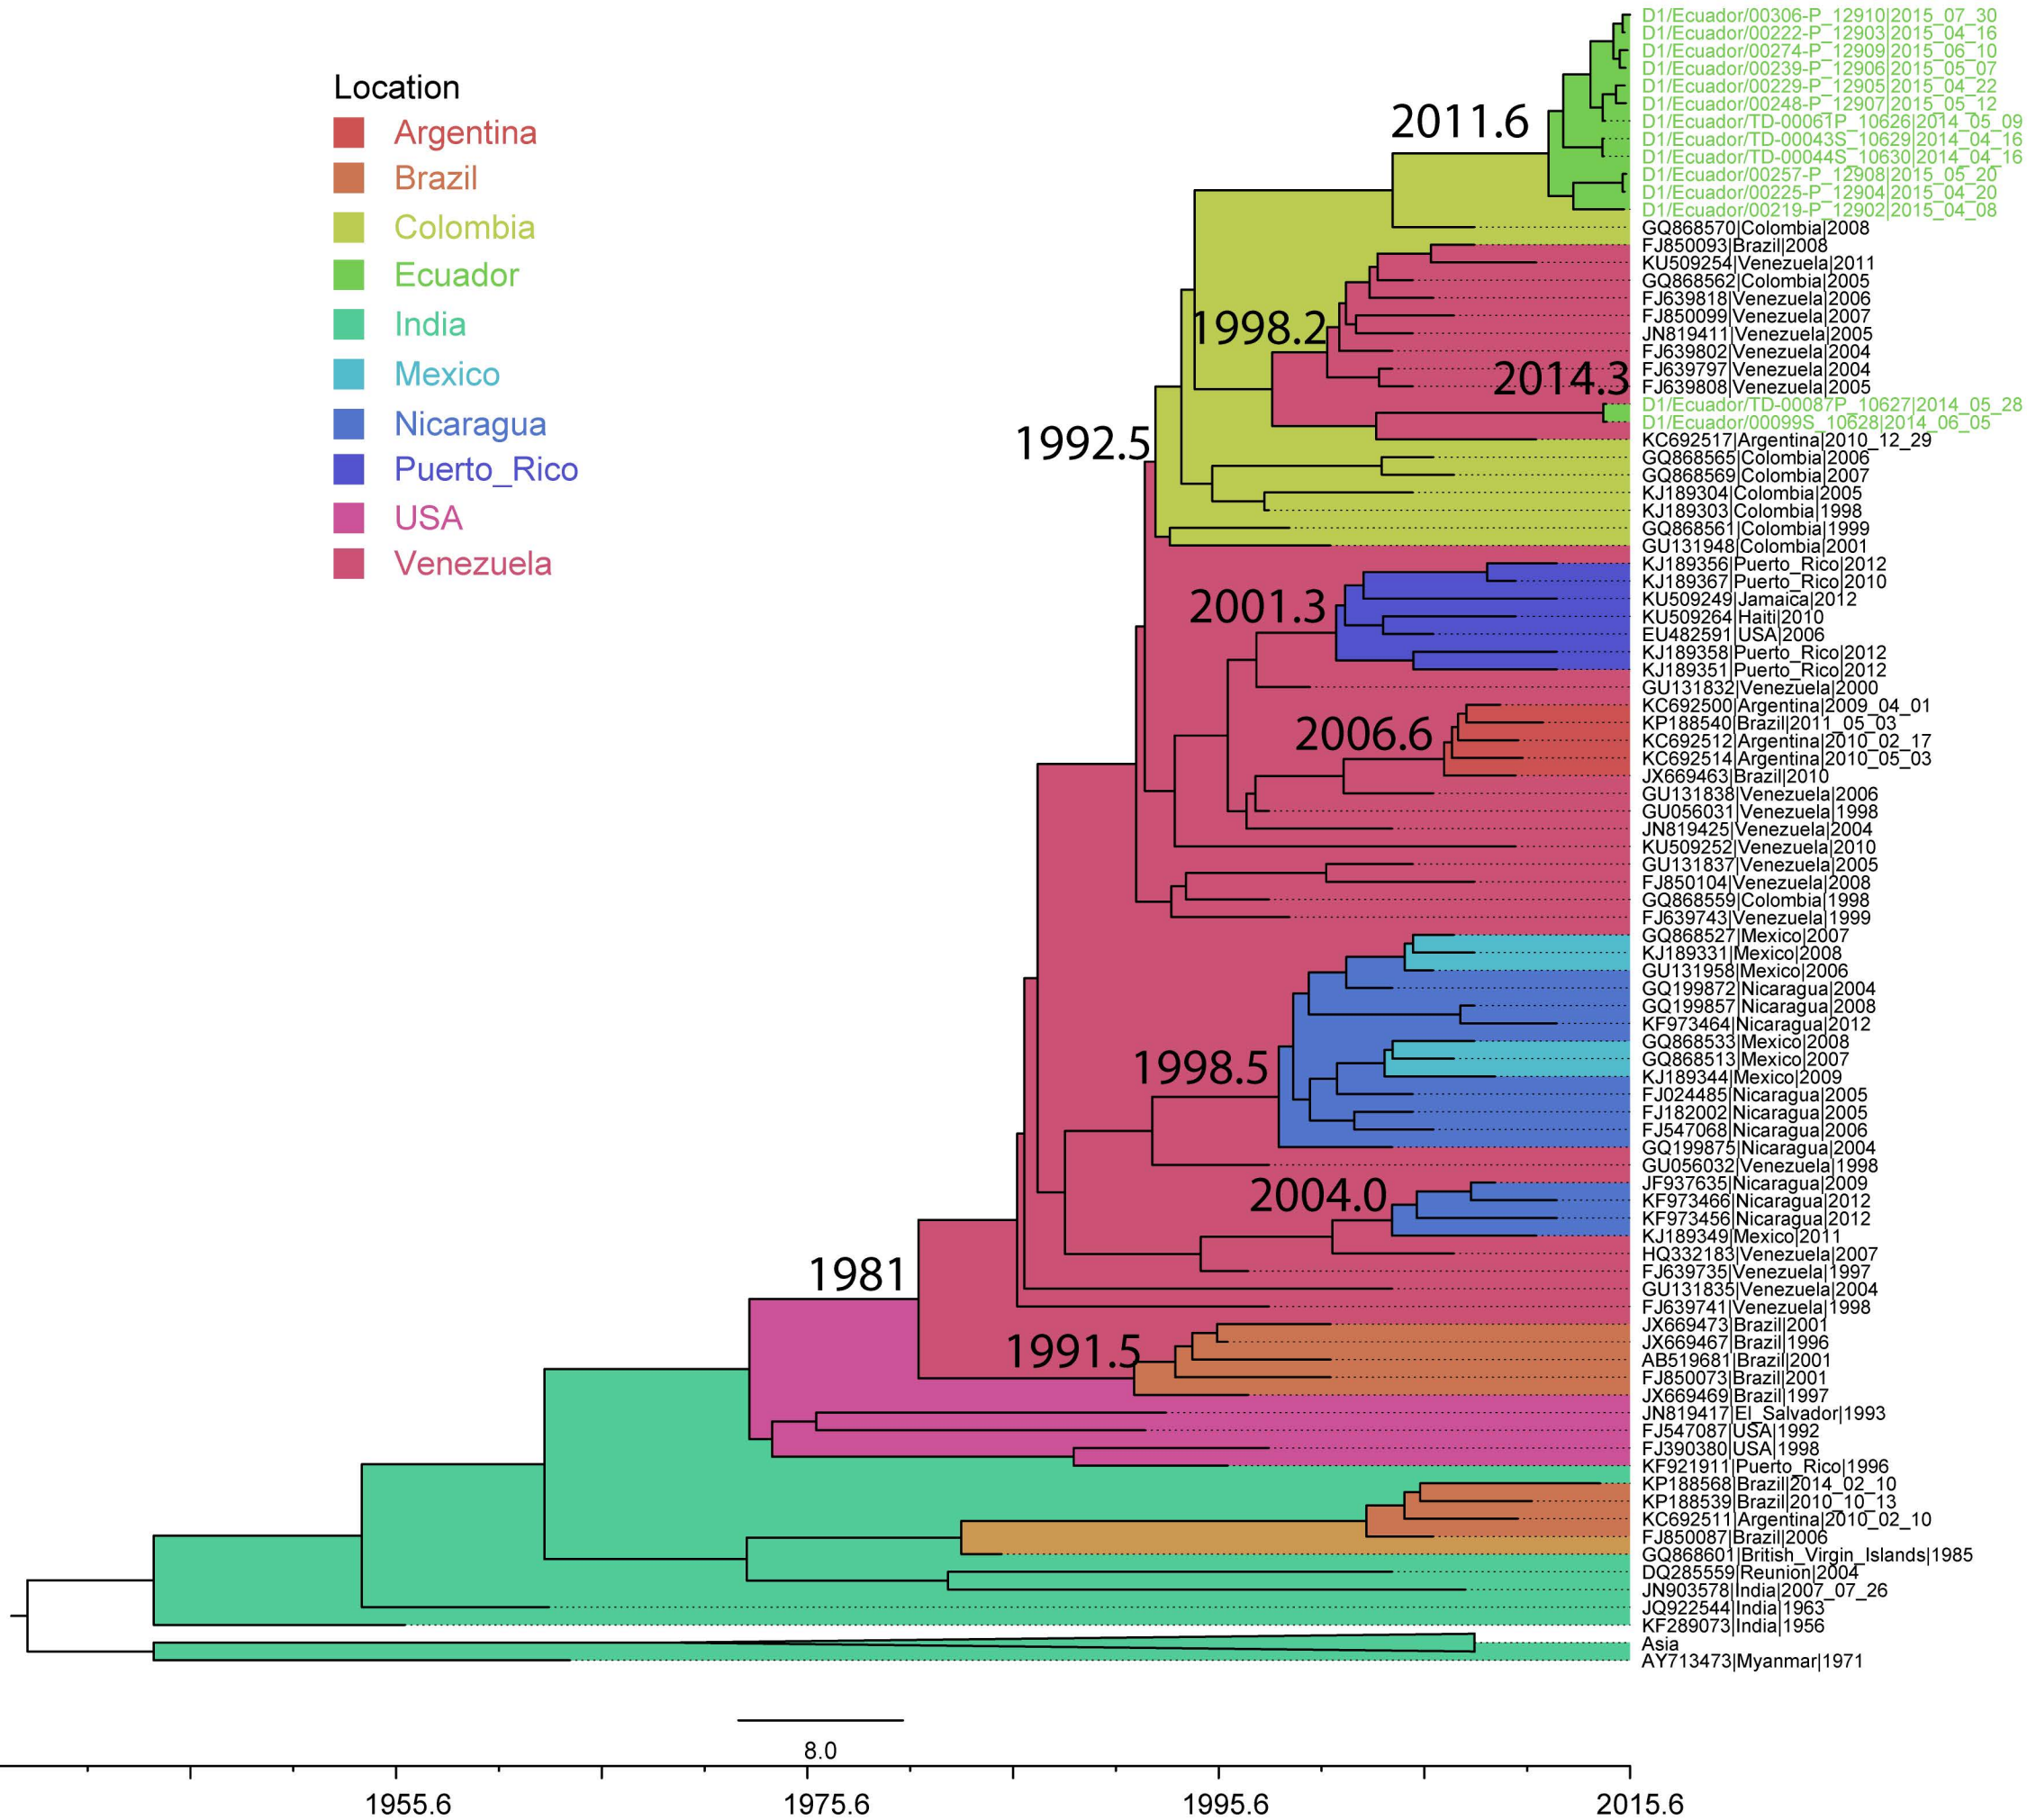

Supplement: 12862_2020_1596_MOESM2_ESM.pdf [file 12862_2020_1596_MOESM2_ESM.pdf]
