# Supplementary material for: The origins of dengue and chikungunya viruses in Ecuador following increased migration from Venezuela and Colombia
Source: PubMed Central journal article supplement (PMC7031975; doi:10.1186/s12862-020-1596-8), 2020-02-19

- Brazil
- Colombia
- Cuba
- Dominican\_Republic
- Ecuador
- French\_Guiana
- Mexico
- Nicaragua
- Peru
- Puerto\_Rico
- USA
- Venezuela
- Viet\_Nam
- Virgin\_Islands

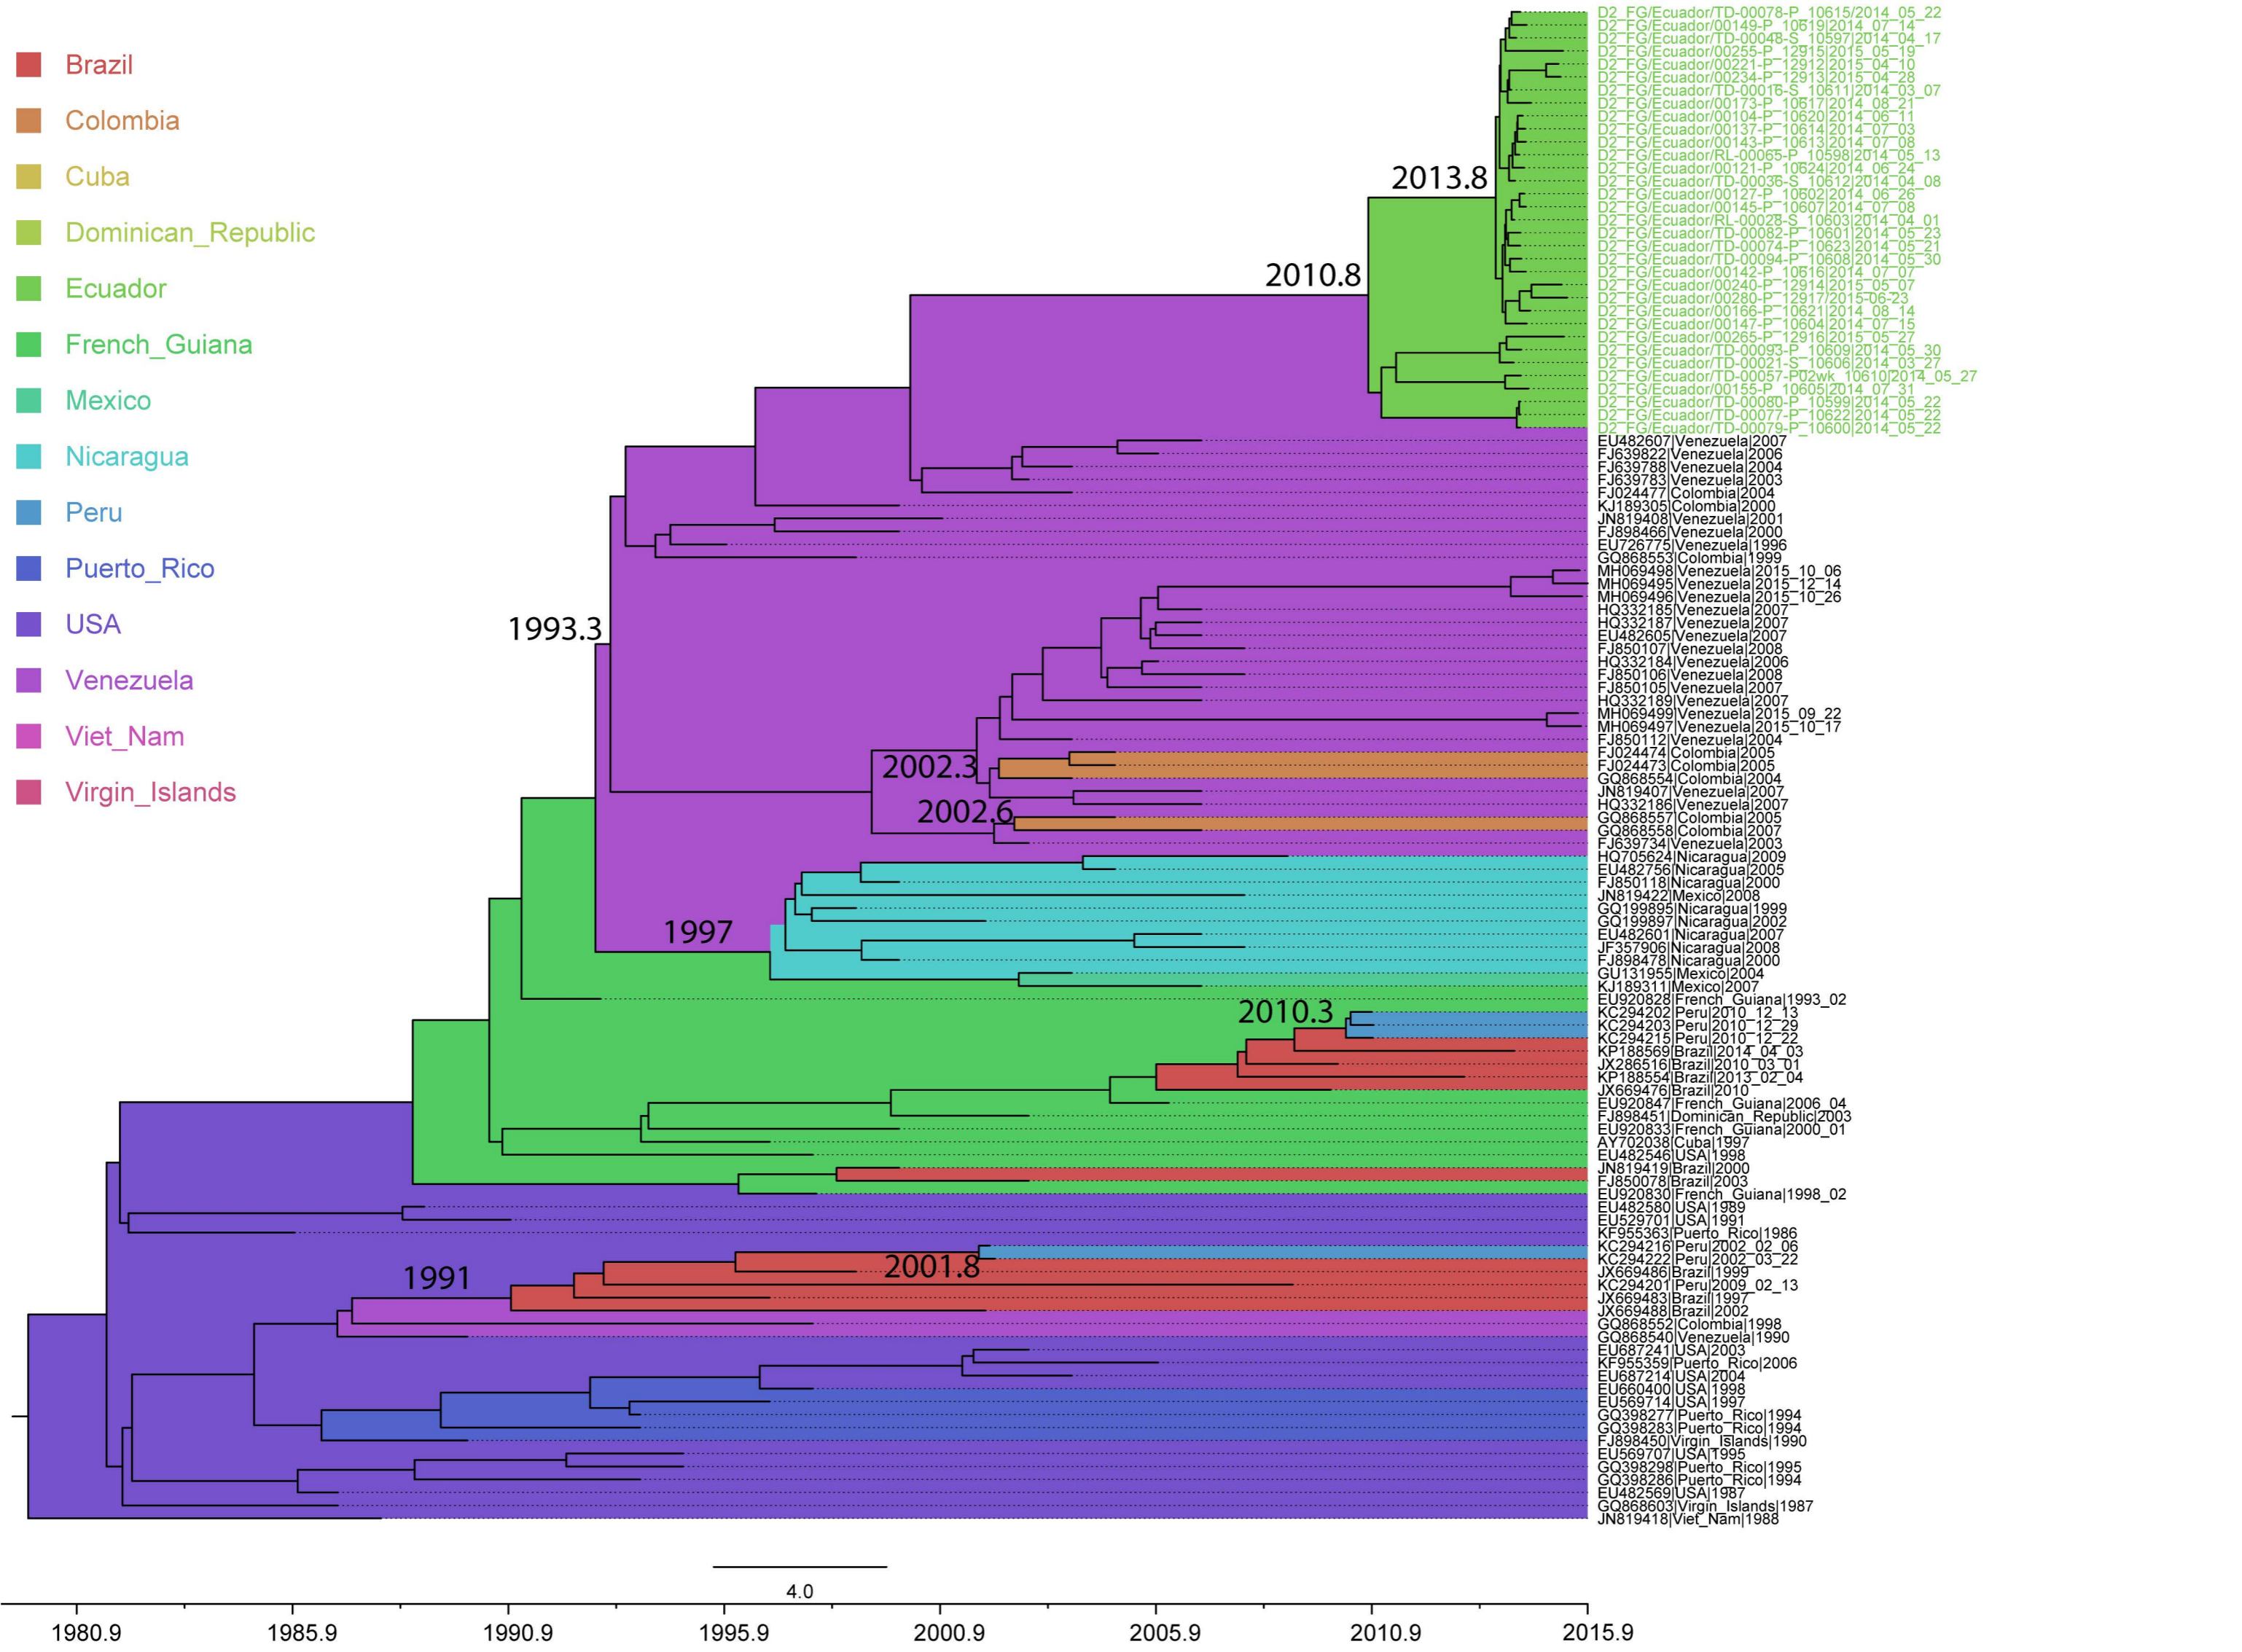

Supplement: 12862_2020_1596_MOESM5_ESM.pdf [file 12862_2020_1596_MOESM5_ESM.pdf]
